# Supplementary material for: A Whole-Genome Sequencing Approach To Study Cefoxitin-Resistant Salmonella enterica Serovar Heidelberg Isolates from Various Sources
Source: PubMed Central journal article supplement (PMC5365727; doi:10.1128/aac.01919-16), 2017-03-24
Supplement: AAC.01919-16_zac004176050s1.pdf [file AAC.01919-16_zac004176050s1.pdf]

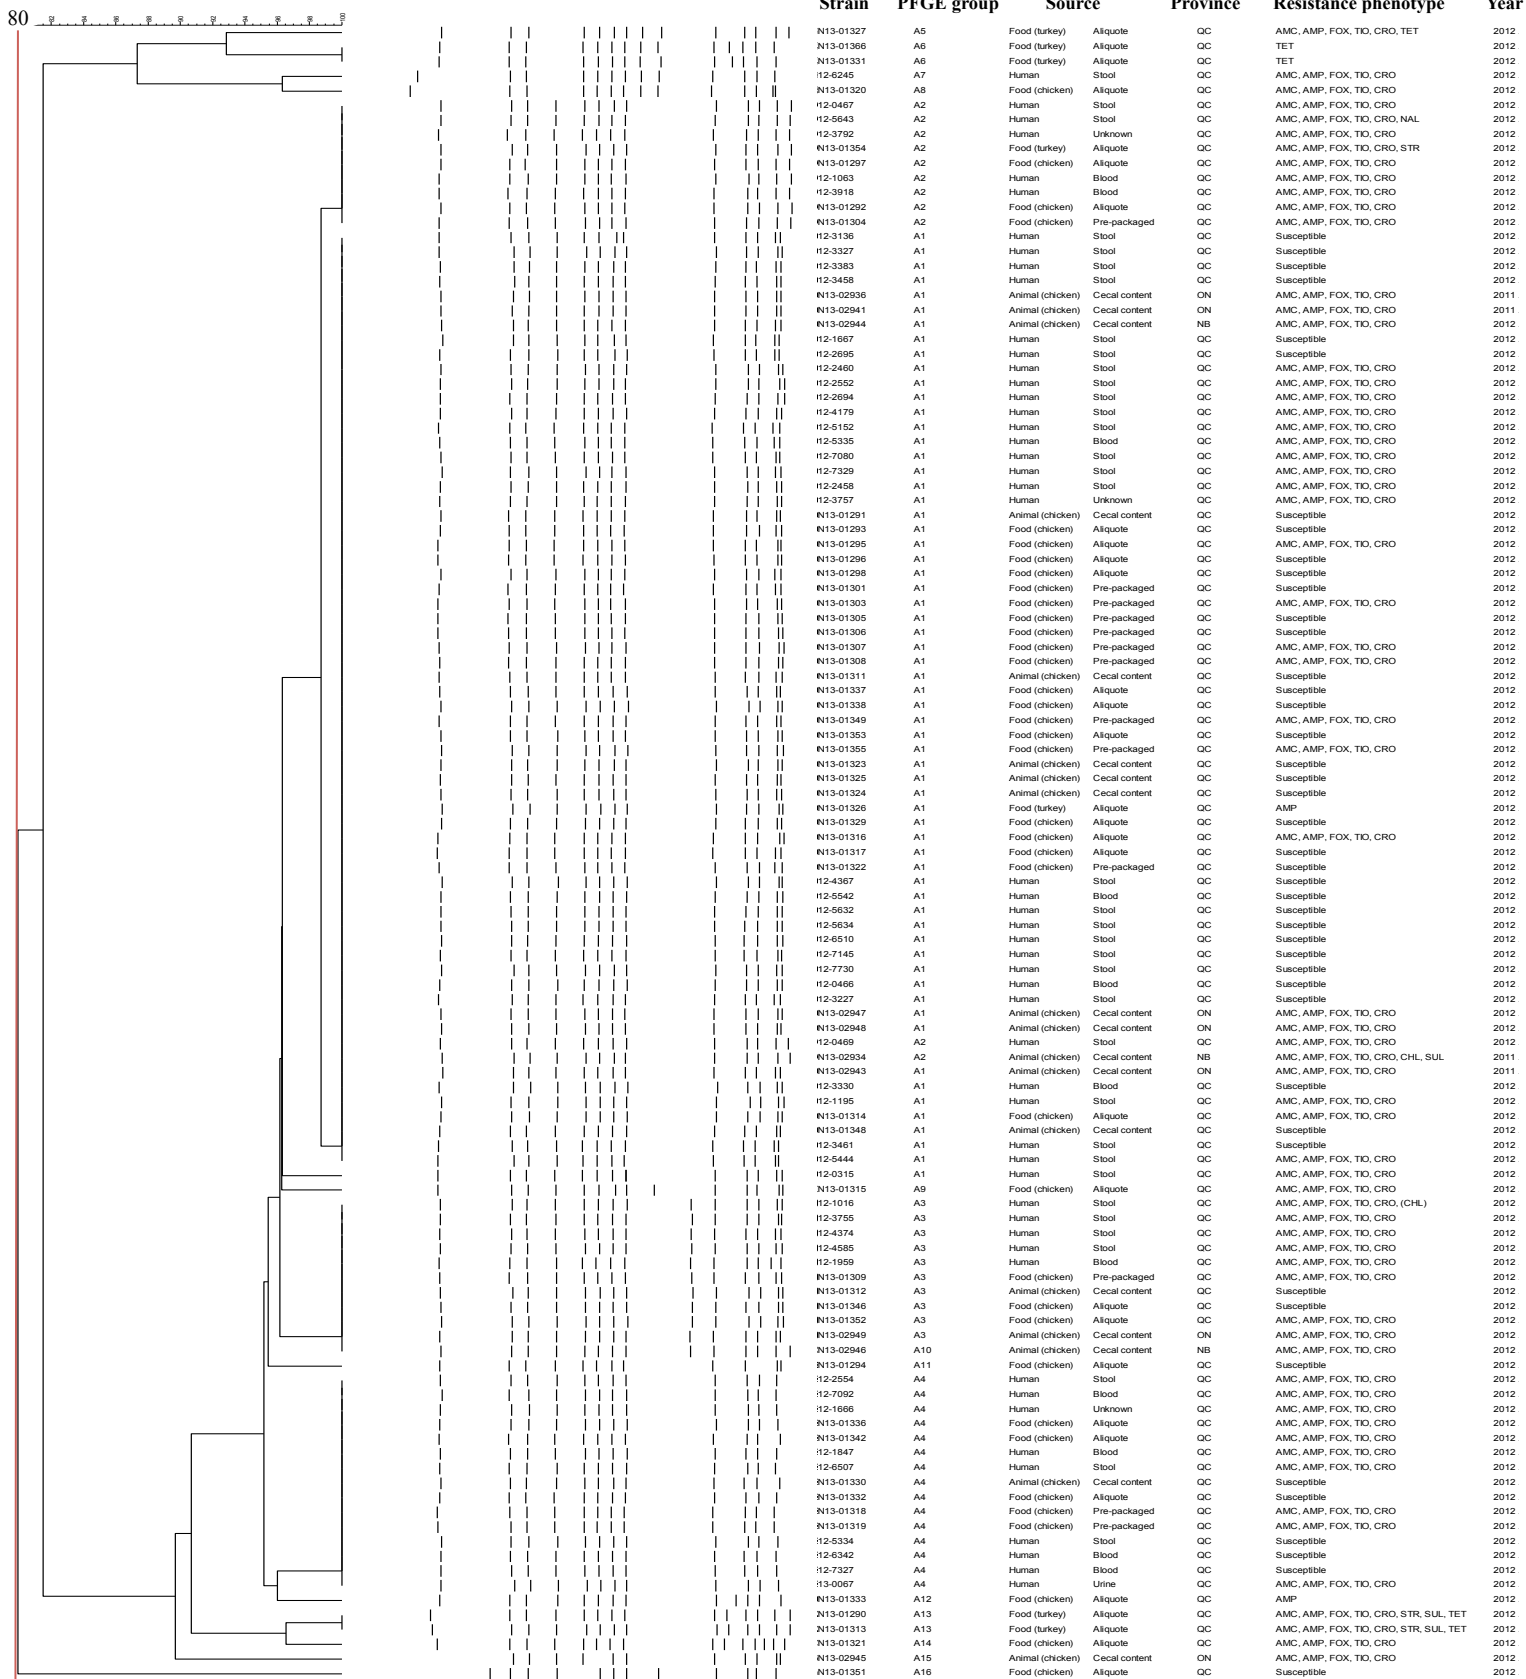

**Figure 1.** Pulsed-field gel electrophoresis band patterns and dendrogram of 113 *Xba*I digested *Salmonella* Heidelberg isolates. Gels were analyzed using BioNumerics v.5.1, with a band tolerance of 1.5% and optimized at 1.5%, and cluster analysis performed using the Dice coefficient and unweighted pair group method with arithmetic mean (UPGMA). The solid vertical red line indicates isolates having  $\geq 80\%$  similarity. Abbreviations of provinces are as follows: NB, New Brunswick; ON, Ontario; QC, Quebec. Abbreviations of antimicrobials are as follows: AMC, amoxicillin/clavulanic acid; AMP, ampicillin; CHL, chloramphenicol; CRO, ceftriaxone; FOX, cefoxitin; NAL, nalidixic acid; STR, streptomycin; SUL, sulfamethoxazole; TET, tetracycline; TIO, ceftiofur.
